# Supplementary material for: Honey Bee Infecting Lake Sinai Viruses
Source: MDPI journal article supplement (doi:10.3390/v7062772), 2015-06-23

**Supplemental Figure S5.** Lake Sinai virus 4 MT2014 (KR021356), LSV4 (JX878492) and LSV1 (HQ871931) nucleotide sequences were aligned using the Geneious R8 alignment tool.

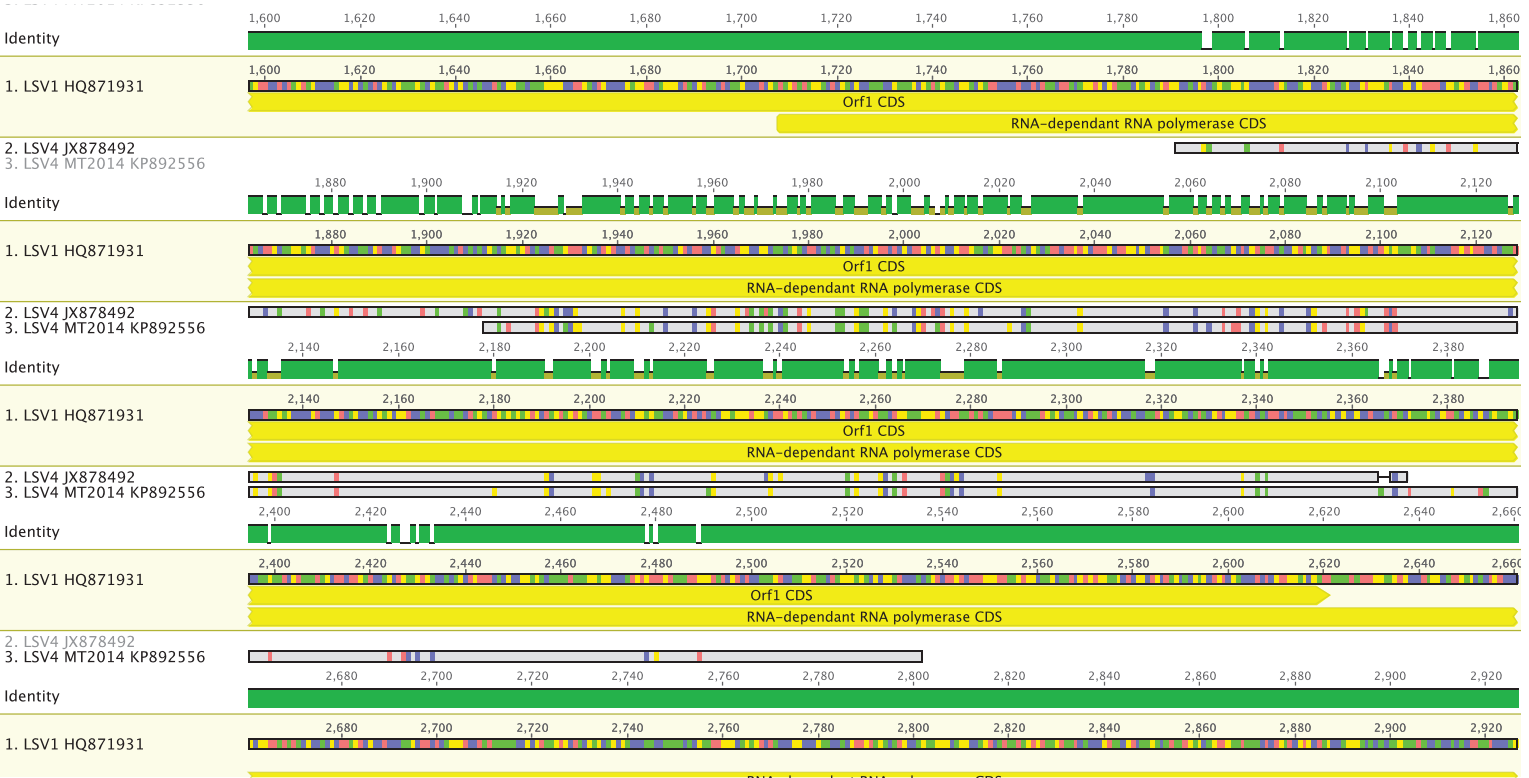

Supplement: s1 [file s1]
