# Supplementary material for: Honey Bee Infecting Lake Sinai Viruses
Source: MDPI journal article supplement (doi:10.3390/v7062772), 2015-06-23

**Supplemental Figure S3.** Lake Sinai virus 1 additional 3'end sequence obtained by sequencing 3' RACE (Rapid Amplification of cDNA ends) products; GenBank KR022003.

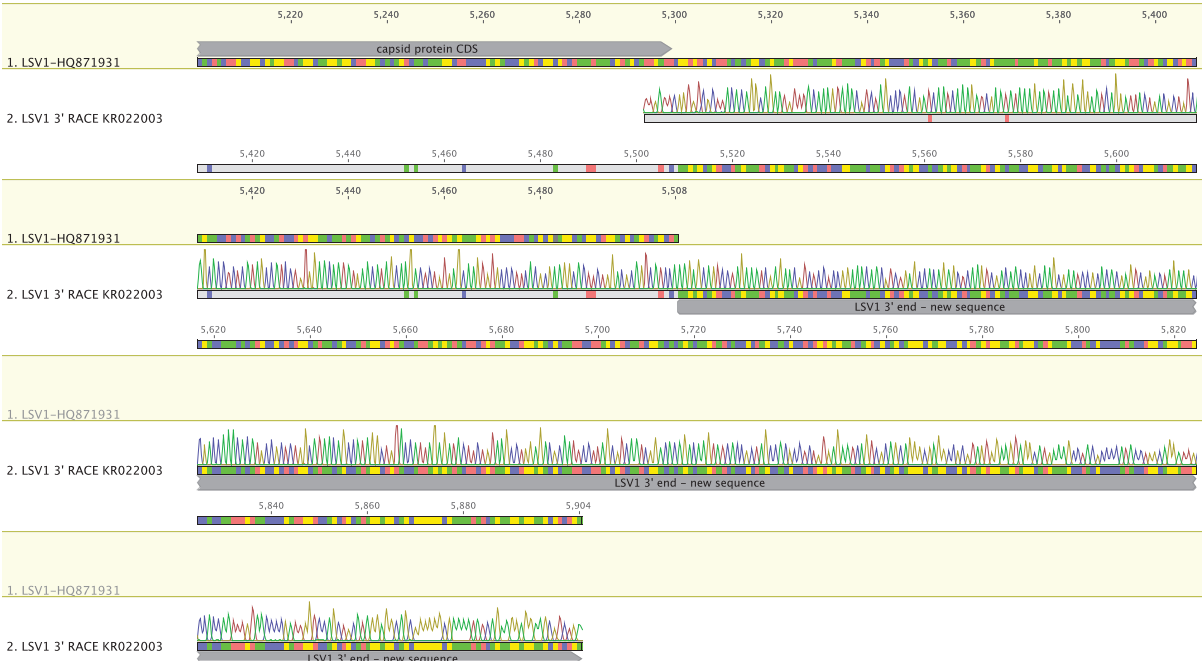

Supplement: s1 [file s1]
