# Supplementary material for: Honey Bee Infecting Lake Sinai Viruses
Source: MDPI journal article supplement (doi:10.3390/v7062772), 2015-06-23
Supplement: s1 [file s1]

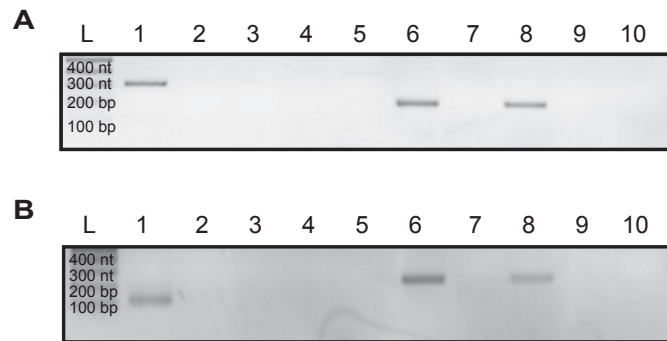

### Supplemental Figure S1. LSV1 and LSV2 negative strand detection

RNA isolated from a LSV containing honey bees lysate was reverse-transcribed with the primer listed below, treated with Exonuclease I to remove excess primer, and amplified using the PCR primers listed for each lane:

#### (A) LSV1 data

(L) molecular weight ladder

- (1) RT with tagged-negative strand specific LSV1 primer (LSV1-F-1433-TAGS), PCR with TAGS and LSV1&2U-R-1744 primers
- (2) negative control: no RT in the presence of (LSV1-F-1433-TAGS), PCR with TAGS and LSV1&2U-R-1744 primers
- (3) negative control: RT with tagged-negative strand specific LSV1 primer (LSV1-F-1433-TAGS), PCR with only LSV1&2U-R-1744 primer
- (4) negative control: RT with random hexamer primer, PCR with TAG and LSV1&2U-R-1744 primers
- (5) negative control: no RT in the presence of random hexamer primer, PCR with LSV1 qPCR primers (qLSV1-F-2569 and qLSV1-R-2743)
- (6) positive control: RT with random hexamer primer, PCR with LSV1 qPCR primers (qLSV1-F-2569 and qLSV1-R-2743)
- (7) negative control: RT with random hexamer primer, PCR only reverse LSV qPCR primer (qLSV1-R-2743).
- (8) evidence of self priming: RT with no primer, PCR with LSV1 qPCR primers (qLSV1-F-2569 and qLSV1-R-2743)
- (9) negative control: no template PCR with TAGS and LSV1&2U-R-1744 primers
- (10) negative control: no template PCR with LSV1 qPCR primers (qLSV1-F-2569 and qLSV1-R-2743)

#### (B) LSV2 data

(L) molecular weight ladder

- (1) RT with tagged-negative strand specific LSV2 primer (LSV2-F-1433-TAGS), PCR with TAGS and LSV1&2U-R-1744 primers
- (2) negative control: no RT in the presence of (LSV2-F-1433-TAGS), PCR with TAGS and LSV1&2U-R-1744 primers
- (3) negative control: RT with tagged-negative strand specific LSV2 primer (LSV2-F-1433-TAGS), PCR with only LSV1&2U-R-1744 primer
- (4) negative control: RT with random hexamer primer, PCR with TAGS and LSV1&2U-R-1744 primers
- (5) negative control: no RT in the presence of random hexamer primer, PCR with LSV1 qPCR primers (qLSV2-F-1722 and qLSV2-R-1947)
- (6) positive control: RT with random hexamer primer, PCR with LSV2 qPCR primers (qLSV2-F-1722 and qLSV2-R-1947)
- (7) negative control: RT with random hexamer primer, PCR only reverse LSV2 qPCR primer (qLSV2-R-1947).
- (8) evidence of self priming: RT with no primer, PCR with LSV2 qPCR primers (qLSV2-F-1722 and qLSV2-R-1947)
- (9) negative control: no template PCR with TAGS and LSV1&2U-R-1744 primers
- (10) negative control: no template PCR with LSV2 qPCR primers (qLSV2-F-1722 and qLSV2-R-1947)
