# Supplementary material for: Honey Bee Infecting Lake Sinai Viruses
Source: MDPI journal article supplement (doi:10.3390/v7062772), 2015-06-23
Supplement: s1 [file s1]

A

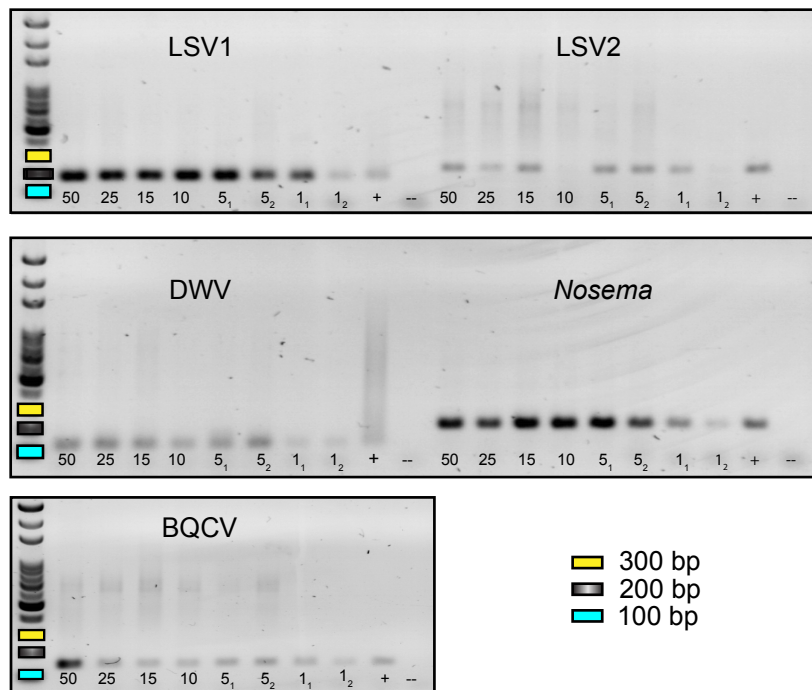

B

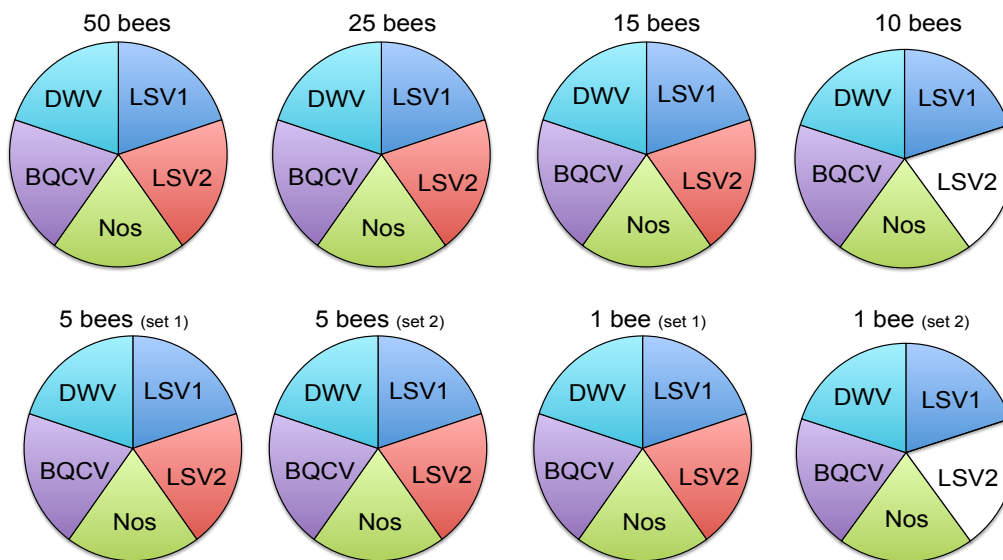

**Supplemental Figure S10. Pathogen detection in RNA samples prepared from variable numbers of honey bees obtained from a single colony.** Different quantities of honey bees (50, 25, 15, 10, 5, or 1) were homogenized (i.e., samples of  $\geq 10$  frozen bees were homogenized in sealed plastic bags using a marble rolling pin, then thoroughly mixed by shaking contents, prior to transferring 1 gram of material per sample to a microfuge tube (2 ml) for RNA extraction; samples of  $\leq 5$  bees were homogenized in microfuge tubes (2 ml) using 3mm glass beads (see Methods section for additional details)). Following RNA extraction and reverse transcription of a normalized amount of RNA (2000 ng) from each sample, pathogen-specific PCR was performed to identify the pathogens present in each sample. Samples from this representative colony tested positive for BQCV, DWV, LSV1, LSV2, and *Nosema ceranae*.

A. Images of LSV1, LSV2, DWV, *Nosema ceranae*, and BQCV PCR products after agarose gel electrophoresis; sample sizes (i.e., 50, 25, 15, 10, 5<sub>(set1)</sub>, 5<sub>(set2)</sub>, 1<sub>(set1)</sub>, and 1<sub>(set2)</sub>) are noted in each lane.

B. Graphical representation of pathogens detected in each sample. Colored regions of each pie-chart indicate that the pathogen was detected, whereas white areas indicate that the pathogen was not detected in that sample. The results from this representative experiment of 3 replicates (see Supplemental Table S6), indicate that a sample size of 5 adequately represents the majority of pathogens associated with a particular colony.
