# Supplementary material for: Honey Bee Infecting Lake Sinai Viruses
Source: MDPI journal article supplement (doi:10.3390/v7062772), 2015-06-23
Supplement: s1 [file s1]

**Supplemental Figure S2.** Lake Sinai virus 2 additional 5'end sequence obtained by sequencing 5' RACE (Rapid Amplification of cDNA ends) product aligned with LSV2 (HQ888865) sequences using Geneious R8 nucleotide alignment. The percent nucleotide identity to LSV1 and LSV2 is shown in the matrix below.

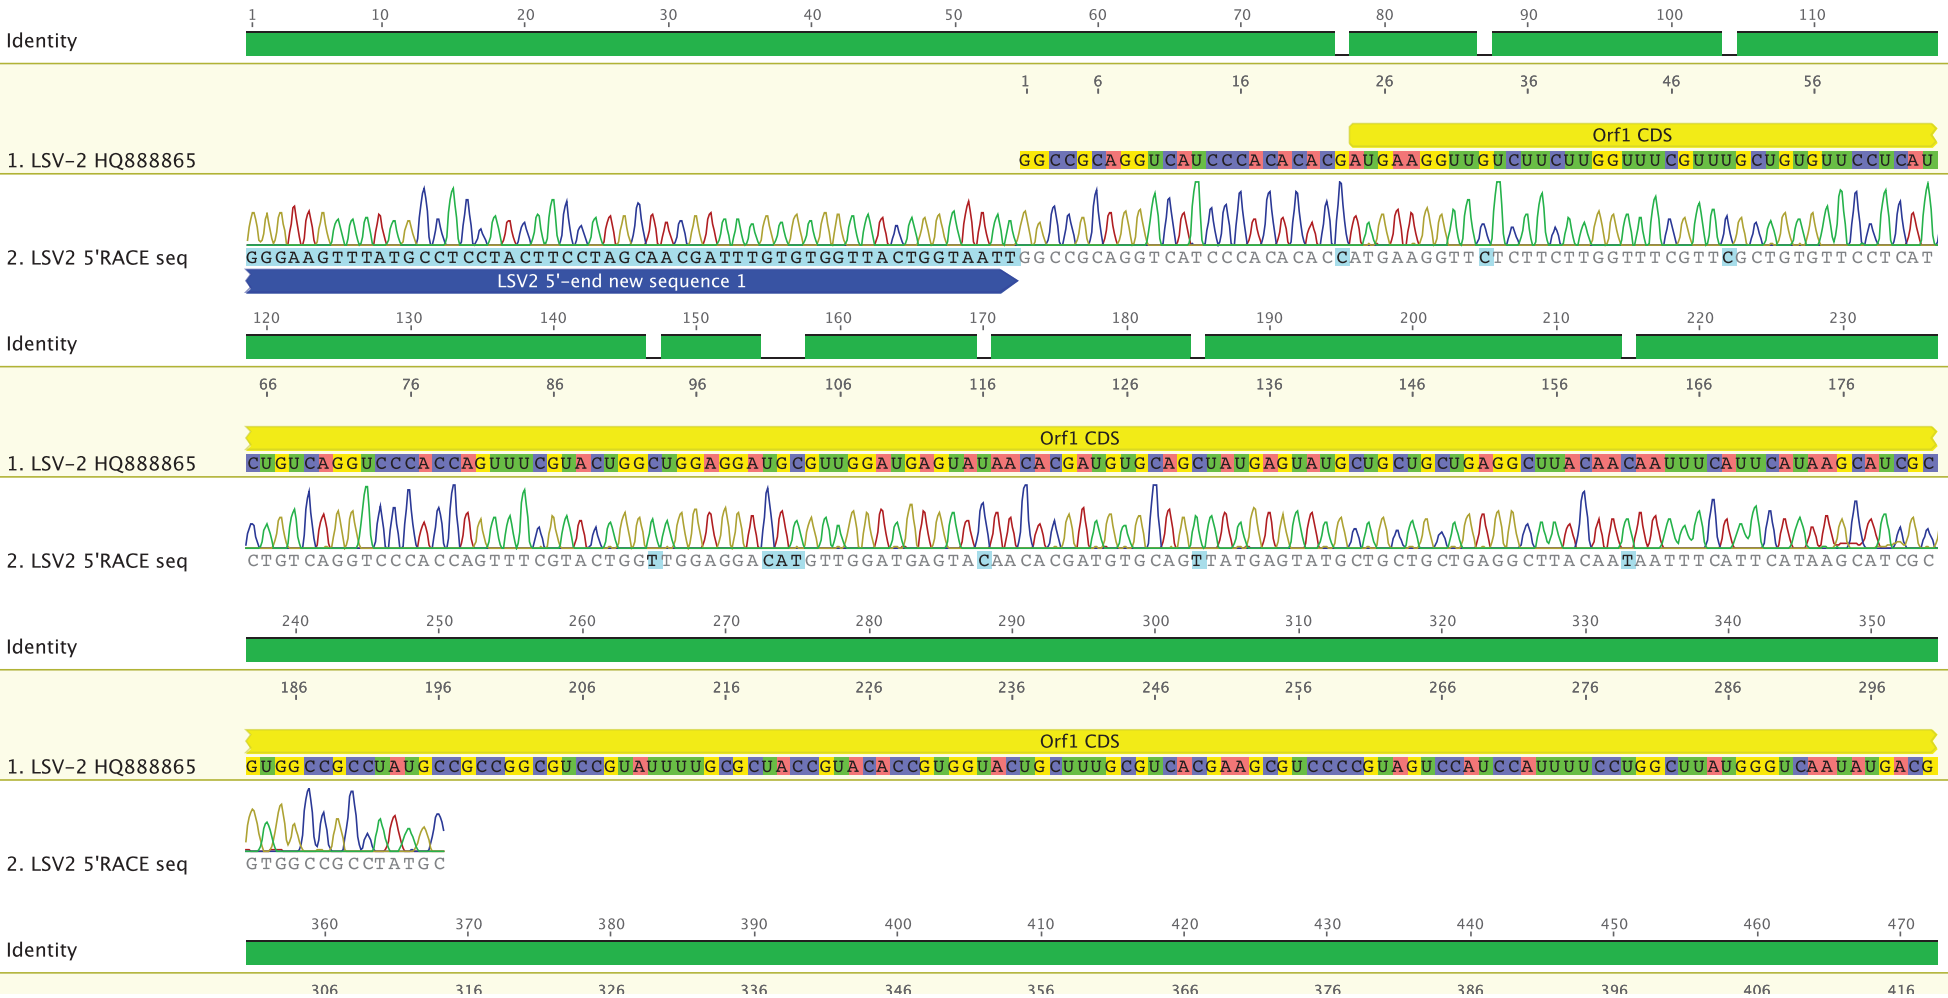

|             | LSV-2 | LSV2 5'RACE | LSV1  |
|-------------|-------|-------------|-------|
| LSV-2       |       | 94.90       | 70.29 |
| LSV2 5'RACE | 94.90 |             | 74.32 |
| LSV1        | 70.29 | 74.32       |       |
