# Supplementary material for: Honey Bee Infecting Lake Sinai Viruses
Source: MDPI journal article supplement (doi:10.3390/v7062772), 2015-06-23
Supplement: s1 [file s1]

|       | # bees    | LSV1 | LSV2 | LSV3 | BQCV | DWV | <i>C.m./L.p.</i> | <i>Nosema</i> |
|-------|-----------|------|------|------|------|-----|------------------|---------------|
| Rep 1 | 50        | 1    | 1    | 1    | 1    | 1   | 1                | 1             |
|       | 25        | 1    | 1    | 1    | 1    | 1   | 1                | 1             |
|       | 15        | 1    | 1    | 1    | 1    | 1   | 1                | 1             |
|       | 10        | 1    | 0    | 1    | 1    | 1   | 1                | 1             |
|       | 5 (set 1) | 1    | 1    | 1    | 1    | 1   | 1                | 1             |
|       | 5 (set 2) | 1    | 1    | 1    | 1    | 1   | 1                | 1             |
|       | 1 (set 1) | 1    | 0    | 1    | 1    | 1   | 1                | 1             |
|       | 1 (set 2) | 1    | 1    | 1    | 1    | 1   | 1                | 1             |

|       | # bees    | LSV1 | LSV2 | LSV3 | DWV | <i>Nosema</i> |
|-------|-----------|------|------|------|-----|---------------|
| Rep 2 | 50        | 1    | 1    | 1    | 0   | 0             |
|       | 25        | 1    | 1    | 1    | 0   | 1             |
|       | 15        | 1    | 1    | 1    | 0   | 1             |
|       | 10        | 1    | 1    | 1    | 0   | 1             |
|       | 5 (set 1) | 1    | 1    | 1    | 0   | 0             |
|       | 5 (set 2) | 1    | 1    | 1    | 0   | 0             |
|       | 1 (set 1) | 1    | 1    | 0    | 0   | 0             |
|       | 1 (set 2) | 1    | 1    | 1    | 0   | 0             |

|       | # bees    | LSV1 | LSV2 | DWV | <i>Nosema</i> |
|-------|-----------|------|------|-----|---------------|
| Rep 3 | 30        | NA   | 1    | 1   | 0             |
|       | 5 (set 1) | 1    | 1    | 1   | 1             |
|       | 5 (set 2) | 1    | 1    | 1   | 1             |
|       | 5 (set 3) | 1    | 1    | 1   | 0             |

**Supplemental Table S6. Three replicates of pathogen detection in variable numbers of honey bees from a single colony.** The quantity of bees indicated in this table were processed as described in Supplemental Figure S10 / Methods. cDNA was prepared from these RNA samples, and was used in PCR for the pathogens listed above. 1 = pathogen detected; 0 = pathogen not detected; NA = pathogen not tested. Data from replicate 1 were presented in Supplemental Figure S10.
