# Supplementary material for: Honey Bee Infecting Lake Sinai Viruses
Source: MDPI journal article supplement (doi:10.3390/v7062772), 2015-06-23
Supplement: s1 [file s1]

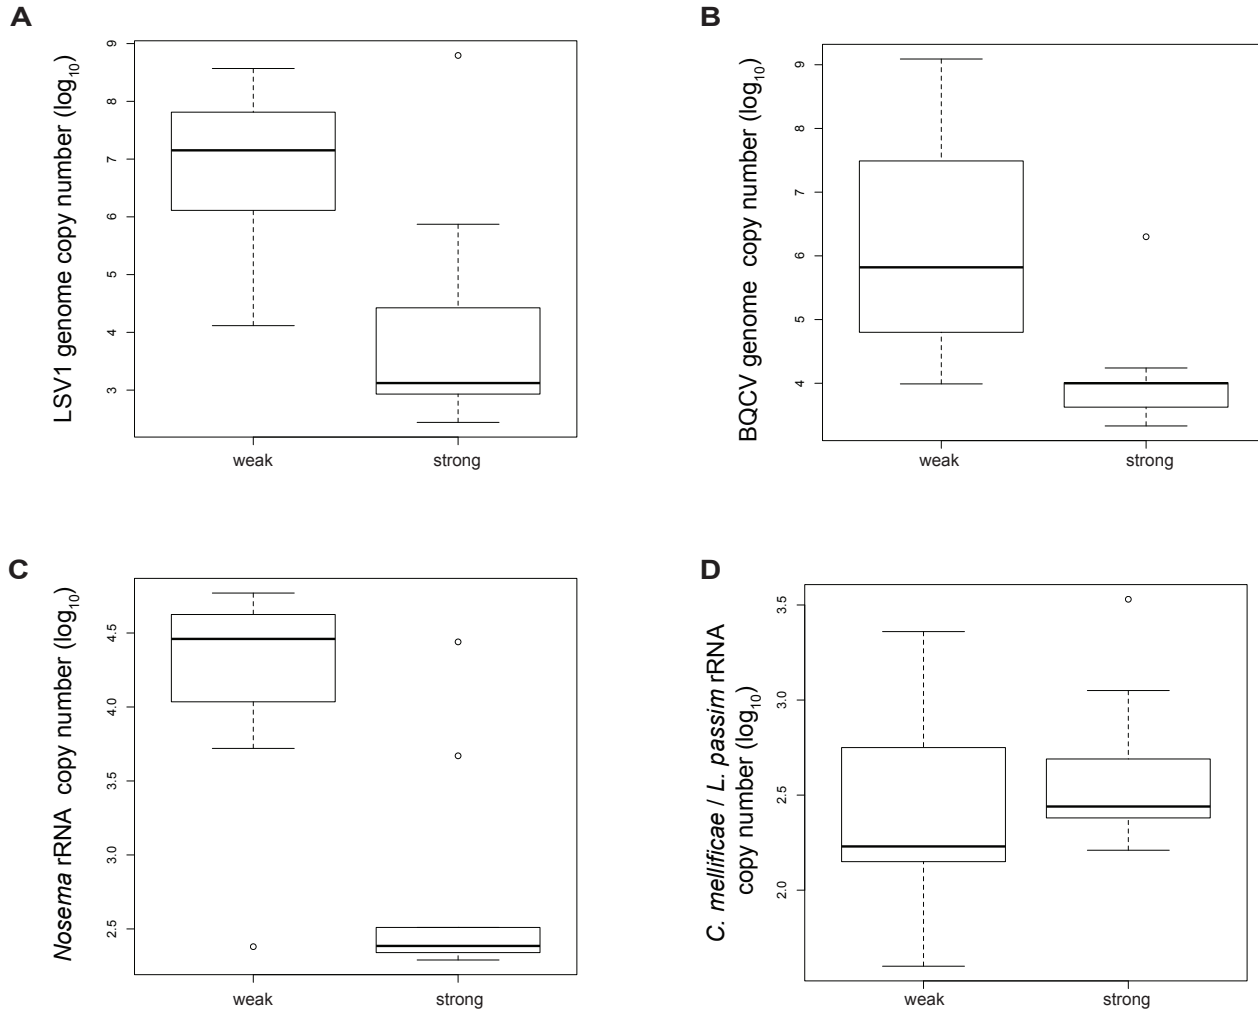

**Supplemental Figure S9. Statistical evaluation of LSV1, BQCV, Nosema, *C. mellificae* / *L. passim* abundance and colony health.**

Honey bee colony health, pathogen prevalence (PCR) and pathogen abundance (qPCR) was monitored from January - March 2013. (Supplemental Table S3). Samples were obtained from six honey bee colonies at 3 or 4 different time points (n=6 colonies, 20 total sampling events). Overall weak colonies (< 5 frames, n=9 sampling events) had greater levels of pathogens relative to strong colonies (>9 frames, n=11 sampling events). The mean abundance of LSV2 was greater in weak colonies ( $\log_{10}=7.55$ ) as compared to strong colonies ( $\log_{10}=3.19$ ,  $p=8.89 \times 10^{-5}$ ) (Figure 7). Likewise weak colonies had a higher mean abundances of (A) LSV1 (weak  $\log_{10}=6.83$  vs. strong  $\log_{10}=4.00$ ,  $p=1.60 \times 10^{-3}$ ), (B) BQCV (weak  $\log_{10}=6.25$  vs. strong  $\log_{10}=4.06$ ,  $p=7.57 \times 10^{-3}$ ), and (C) Nosema ceranae, (weak  $\log_{10}=4.17$  vs. strong  $\log_{10}=2.71$ ,  $p=1.15 \times 10^{-3}$ ), whereas levels of (D) trypanosmatids (*C. mellificae* / *L. passim*) were not statistically different (weak  $\log_{10}=2.40$  vs. strong  $\log_{10}=2.60$ ,  $p=0.35$ ) using a Welch Two Sample t-test to compare the mean pathogen abundance ( $\log_{10}$  qPCR copy number) in weak versus strong colonies.
